# Supplementary material for: Glacier dynamics across precipitation gradients: Can ice-elevation feedbacks overcome the rain shadow in the Olympic Mountains, USA?
Source: Copernicus journal article supplement (doi:10.5194/esurf-2023-7), 2023-02-27
Supplement: Supplementary file [file esurf-2023-7-RC2-supplement.pdf]

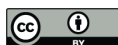

# Glacier dynamics across precipitation gradients: Can ice-elevation feedbacks overcome the rain shadow in the Olympic Mountains, USA?

Andrew A. Margason<sup>1</sup>, Alison M. Anders<sup>2</sup>, Robert J.C. Conrick<sup>3</sup>, and Gerard H. Roe<sup>4</sup>

5 <sup>1</sup>Department of Geology, University of Illinois, Urbana, IL, 61801, USA; now at Ramboll 60606, USA

<sup>2</sup> Department of Geology, University of Illinois, Urbana, IL, 61801, USA

<sup>3</sup>Department of Atmospheric Sciences, University of Washington, Seattle, WA, 98195, USA

<sup>4</sup>Department of Earth and Space Sciences, University of Washington, Seattle, WA, 98195, USA

10

*Correspondence to:* Alison M. Anders ([amanders@illinois.edu](mailto:amanders@illinois.edu))

**Abstract.** Glacier extent is known to be sensitive to climate variability through time. The impact of spatial variability  
15 in climate on glaciers has been much less studied. The Olympic Mountains of Washington State, USA, experience a  
pronounced precipitation gradient with modern annual precipitation ranging between ~6.5 meters on the high west-facing  
slopes to ~0.5 meters in the northeast lowlands. In the Quinault valley, on the west side of the range, a glacier extended onto  
the coastal plain reaching a maximum position during the early Wisconsin Episode glaciation. There is no evidence of a large  
Elwha glacier extending into the northeast lowlands at that time. We hypothesize that the asymmetry in past glacier extent was  
20 driven by spatial variability in precipitation. To evaluate this hypothesis, we first constrain the past precipitation gradient, and  
then model glacier extent. We explore variability in observed and modelled precipitation gradients over timescales from 6  
hours to ~100 years. Across three data sets, basin-averaged precipitation in the Elwha is 54% of that in the Quinault, with  
variability of less than 15% at the annual timescale. Specifically, this ratio does not consistently vary with regional climate  
patterns. On average, modelled 6-hour accumulated precipitation in the Elwha is 78% of that in the Quinault during a winter  
25 season, with a few low-precipitation time periods exhibiting a flatter or even reversed precipitation gradient. Overall, our  
analysis does not suggest a mechanism for increasing the precipitation gradient, but overwhelmingly indicates spatially  
coherent variability in precipitation across the peninsula. We conclude that the past precipitation gradient was likely similar to  
the modern gradient. We use a one-dimensional glacier flowline model, driven by sea-level summer temperature and annual  
precipitation to approximate glacier extent in the Quinault and Elwha basins. We find several equilibrium states for the

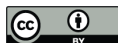

30 Quinault glacier at the mapped maximum position within paleoclimate constraints for cooling and drying, relative to today. We assume the Elwha remained drier than the Quinault, and model Elwha extent for the climates of the Quinault equilibria. At the warm end of the paleoclimate constraint ( $10.5^{\circ}\text{C}$ ), the Elwha remains a small valley glacier in the high headwaters. Yet, for the cooler end of the allowable paleoclimate ( $7^{\circ}\text{C}$ ), the Elwha glacier advances to a narrow notch in the valley. As the ice is forced to flow through a smaller cross-section, it thickens, triggering an ice-elevation feedback. This feedback leads to rapid  
35 extension of the Elwha glacier to elevations only  $\sim 100$  meters above those reached by the Quinault. While there is uncertainty in the glacial record of the Elwha, it is unlikely that such a large glacier existed during the most recent glaciation. Therefore, we suggest that the last glacial maximum climate was more likely to have been within the warm end of the paleoclimate range. Alternatively, spatially variable drivers of ablation including differences in cloudiness could have contributed to asymmetry in glacier extent. Future research to constrain past precipitation gradients and evaluate their impact on glacier dynamics is  
40 needed to better interpret the climatic significance of past glaciation and to predict future response of glaciers to climate change.

## 1 Introduction

Glaciers are sensitive indicators of climate change through time because glacier extent is dependent on climate variables including precipitation, temperature, insolation, and cloudiness (e.g., Braithwaite et al., 2003; Wagnon et al., 2003; Kessler et al., 2006; Rupper and Roe, 2008; Anders et al., 2010). The sensitivity of glaciers to climate has been used to interpret  
45 past changes and predict future changes in glacier extent as a response to, and record of, temporal changes in climate (Oerlemans et al., 1998; Roe, 2011). However, climate not only varies in time, but also in space. Spatial variability in precipitation due to topographic forcing (i.e., a rain shadow) is a well-documented and generally well-understood example of a robust spatial gradient in climate (Roe, 2005). How does glacier extent vary across a mountain range with a significant rain



shadow? We consider this question for the Olympic  
50 Mountains of Washington State, USA (Figure 1a). This  
mountain range on the Pacific northwest coast has small  
modern glaciers and evidence of extensive glaciation during  
the Pleistocene (Thackray, 2001). We begin by assessing the  
possibility of significant changes in rain-shadow strength  
55 during glacial conditions relative to the present. Having  
established that spatial gradients in precipitation are likely a  
robust feature of the climate of the Olympic Mountains, we  
simulate the evolution of glaciers on the windward and  
leeward side of the range to examine the impact of the rain  
60 shadow on glacier extent.

*Figure 1. Panel A: Topography of the Olympic Peninsula.*  
*Terminal moraines of the west side valleys shown in black*  
*(Marshall, 2013; Staley, 2015). Radiosondes are routinely*  
*65 launched from the black star KUIL (Rutledge and Ciesielski,*  
*2016). We define the Elwha and Quinault basins as the*  
*regions upstream of USGS stream gauges, shown as yellow*  
*stars. Panel B: Annual climatological precipitation from the*  
*PRISM model (Daly et al., 2008). Panel C: Total modelled*  
*70 precipitation during the OLYMPEX campaign (Skamarock et*  
*al., 2008).*

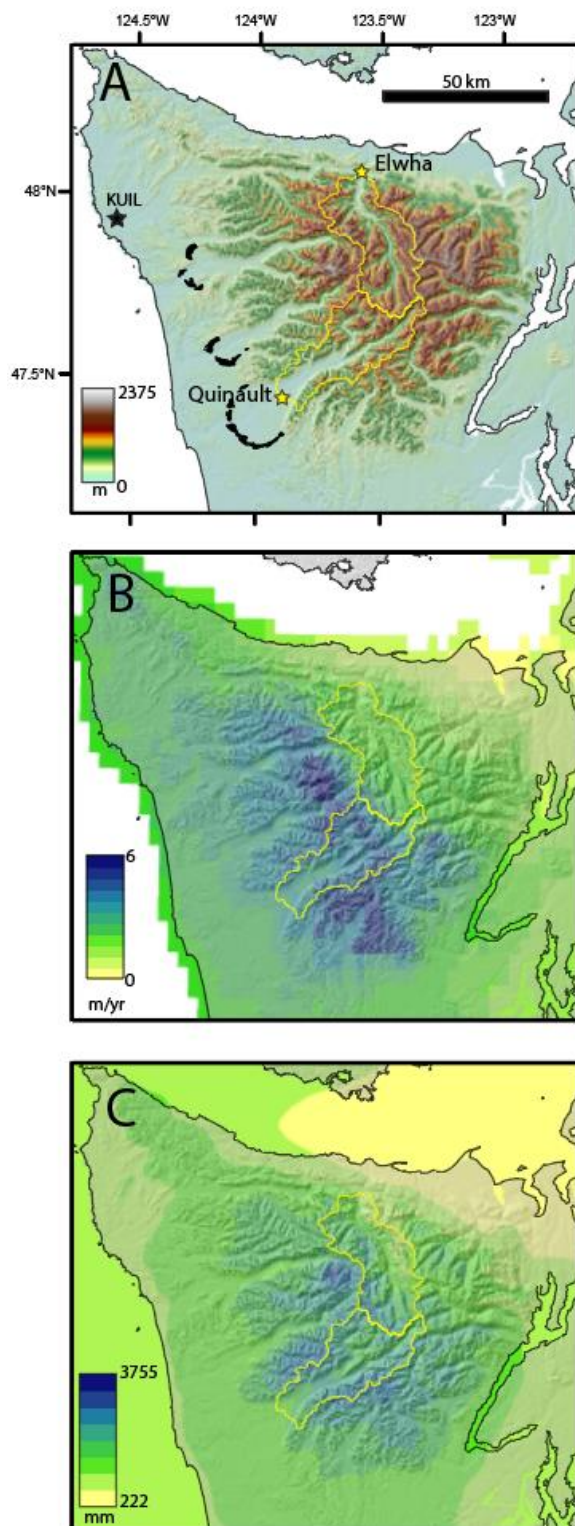



Modern precipitation across the Olympic Mountains is characterized by a steep precipitation gradient (e.g., Hobbs, 1978; Anders et al., 2007; Cao et al., 2018). Annual precipitation varies from ~6.5 meters at high elevations on the western  
75 side of the range to ~0.5 meters on the north-east lowlands (Figure 1b). On the Pacific coast, monthly precipitation totals during the drier warm season (May-September) vary from ~50-150 millimetres per month. In contrast, average monthly totals exceed 400 millimetres during November, December, and January (Minder et al., 2008). Large cool-season precipitation totals are due to the range lying in the path of the wintertime midlatitude storm tracks coming from the Pacific Ocean (Houze et al., 2017; Purnell and Kirshbaum, 2018). Winds directed into the topography induce standing waves in the atmosphere that cause  
80 lifting upwind of the topography. As air rises, it cools causing condensation of cloud droplets; eventually, their coalescence forms falling hydrometeors. These precipitation particles tend to reach the land surface on the windward side of the range, causing large precipitation totals at high elevations along the south-west side of the range. After passing over the crest of the Olympic Mountains, air descends and warms, causing evaporation of hydrometeors and cloud-water droplets. A significant fraction of the moisture has been removed from the air mass, leaving little potential for precipitation on the eastern side of the  
85 range (Zagrodnik et al., 2019).

The paleoclimate of the Olympic Mountains can be inferred through pollen data from a mire at Humptulips in the southwest of the Olympic Peninsula. The pollen data constrains past vegetation and climate approximately 30,000 <sup>14</sup>C yr B.P. (Heusser et al., 1999). The ecosystem during the time of the pollen deposition is interpreted as a coastal tundra dominated by pines. Sea-surface temperatures were more than 5°C colder than present, with precipitation close to 1000 millimetres per year,  
90 as compared with approximately 3000 millimetres per year today. We use these paleoclimate estimates of temperature and drying (relative to the modern) as a constraint on the climates we simulate in our glacier models.

Large glaciers repeatedly descended the western valleys during the early and middle Wisconsin glaciation ~40 kya. This formed U-shaped valleys with steep walls and terminal moraines beyond the range front on the coastal plains (Thackray 2001; Dragovich et al., 2007; Marshall, 2013; Stacey, 2015). In contrast, there is no clear evidence of alpine glaciation at low  
95 elevations in the Elwha valley on the leeside of the Olympic Mountains. Surficial geologic mapping of the Elwha and Angeles Point 7.5-minute Quadrangles approximately 60 km below the headwaters of the basin, did not recognize alpine till from an Elwha valley glacier (Polenz et al., 2004). Therefore, alpine ice in the Elwha valley was most likely quite restricted relative to



the west-side valleys (Hoh, Queets, Quinault). During the most recent glaciation, continental ice of the Puget Lobe of the Cordilleran Ice Sheet advanced into the Strait of Juan de Fuca 17-14 kya B.P. damming the mouth of the Elwha basin (Easterbrook, 1986; Duda et al., 2011). This event could have obscured the geomorphic and surficial geologic record of earlier extensive alpine glaciation of the Elwha valley, allowing for some possibility of unrecognized extensive alpine glaciation in the basin.

There are no modern glaciers in the Quinault valley. However, there are modern alpine glaciers in the Elwha basin, limited to elevations between 1200 and 2200 meters (Riedel et al., 2015). This difference likely reflects the dissimilarities in the hypsometry of the basins with the Elwha having greater area at higher elevation than the Quinault. More generally, it demonstrates that the sensitivity of glaciers to climate is not uniform across the Olympic Mountains. Instead, west-side glaciers and east-side glaciers may be sensitive to different ranges of climate variables.

The tectonic setting of the Olympic Mountains is an accretionary prism at a convergent plate boundary. The oceanic Juan de Fuca plate is subducting below the continental North American Plate. Sediments once deposited on the ocean floor or in the subduction trench of the Juan de Fuca plate accumulated and were deformed during subduction into a thick wedge known as an accretionary prism (Tabor and Cady, 1978). The Olympic Mountains are the emergent portion of this accretionary prism. Subduction and deformation of the accretionary prism is ongoing. Thermochronology suggests that the rate and pattern of rock uplift in the Olympic Mountains has been consistent since ca. 14 Ma and has an average uplift rate of  $\sim 0.28 \text{ km Myr}^{-1}$  (Brandon et al., 1998). Exhumation of the Olympic Mountains varies in space from approximately zero at the coast to  $\sim 0.9 \text{ km Myr}^{-1}$  in the core of the range, in a bullseye pattern (Michel et al., 2018).

The Olympic Mountains are hypothesized to be in both a flux steady-state and a topographic steady-state because rates and spatial patterns of erosion appear to match long-term rock-uplift rates (Pazzaglia and Brandon, 2001). Specifically, a flux steady-state requires that the material flux into the range (uplift) is balanced by a material flux out of the range (exhumation) so that the volume of the range is fixed in time (e.g., Willett, 1999; Adams and Ehlers, 2018). A topographic steady-state is more restrictive and requires that the average cross-sectional shape of the range, and therefore average topographic cross-section is also fixed in time. The evidence for a topographic steady-state comes from the close correspondence of fluvial incision rates inferred from river terraces on the west side of the Olympics in the Clearwater Valley.



125 Fluvial-terrace incision rates agree with long-term exhumation rates derived from fission-track apatite ages in the same region  
(Pazzaglia and Brandon, 2001). The matching rates and spatial patterns of erosion at the timescale of tens-of-thousands of  
years with exhumation at the timescale of a few-million years supports the hypothesis that the topography has remained  
consistent as material moved through the accretionary prism. However, fluvial processes have not been the rule in the past  
million years. The Clearwater River is in the only substantial valley on the west-side that was not glaciated during the  
Wisconsin Episode, and therefore did not experience conditions typical of the range for the last several tens-of-thousands of  
years. A greater understanding of glacier extent and erosion could provide additional data to test the hypothesis of topographic  
130 steady-state.

There is strong evidence in the Olympic Mountains for 1) the modern precipitation gradient, and 2) large glaciers that  
were present on the windward side of the range but not on the lee side during the last glacial episode. Therefore, we hypothesize  
that spatial variability in precipitation controlled past glacier extent. This points us to two questions. First, was the spatial  
variability of precipitation in the past analogous to the modern variability? Second, does the precipitation gradient explain the  
135 asymmetry in glacial extent on either side of the mountain range? To answer these questions, we analyse the modern climate  
across short- and long-term time scales to see how variable the modern precipitation gradient is. We use this analysis of modern  
variability to assess the likelihood of substantially different past precipitation gradients. After establishing the likely strength  
of the past precipitation gradient, we use a 1-D flowline model to predict the extent of glaciation in the Quinault and the Elwha.

## 2 Spatial Variability in Precipitation

### 140 2.1 Methods

We characterize the spatial variability in precipitation across the Olympic Peninsula by comparing the amounts of  
precipitation in the Quinault and Elwha basins. We define a rain shadow index ( $R$ ) in Eq (1):

$$R = \frac{P_e}{P_q} \quad (1)$$

145



where  $P_e$  is the spatially averaged precipitation rate in the Elwha basin and  $P_q$  is the spatially averaged precipitation rate in the Quinault basin. We compute  $R$  over different timescales using three datasets: climatologies based on spatial interpolation of 30-years of observations, annual-precipitation totals inferred from river-discharge measurements, and 6-hour modelled precipitation outputs from a numerical weather-forecast model (the Weather Research and Forecasting, WRF, model).

150 By examining the variability of the rain shadow in time, we can compare it to factors that might influence the precipitation processes in this region. Specifically, we compare 6-hour measures of  $R$  with wind speed, wind direction, temperature, and atmospheric stability to assess the extent to which different types of precipitation events (e.g., cold vs. warm fronts) exhibit different characteristic rain-shadow strengths. At the annual timescale, we compare the annual timeseries of  $R$  derived from river discharge with climate indexes to see if a strong or weak rain-shadow correlates with different regional  
155 climate states. Overall, our goal is to constrain the variability in the rain shadow over long and short timescales in the modern climate to understand causes of particularly strong and weak rain shadows. We leverage this data to constrain the rain-shadow strength during periods of intense glaciation of the Olympic Mountains.

### 2.1.1 Rain-shadow strength derived from spatially interpolated climatologies

160 The Parameter-elevation Regression on Independent Slopes Model (PRISM) uses observations from atmospheric monitoring sites to interpolate climate variables across the United States (Daly et al., 2008). The model divides terrain into topographic facets defined by slope and elevation. We use PRISM at a 4-km resolution normalized over a 30-year period from 1981 to 2010 (Figure 1b) and define a rain-shadow index,  $R_{PRISM}$ , as the ratio of the  $P_e$  and  $P_q$  calculated from PRISM model.

### 165 2.1.2 Rain-shadow strength derived from weather-forecast models

We use archived Weather Research Forecasting (WRF; Skamarock et al., 2008) from the Olympic Mountains Experiment (OLYMPEX; Houze et al., 2017) to understand the strength of the rain shadow at short timescales (Figure 1c). OLYMPEX was a meteorological field campaign in the winter of 2015 - 2016 designed to validate Global Precipitation Measurements (GPM) satellites, and investigate Pacific midlatitude storms as they travel over the Olympic Mountains (Houze



170 et al., 2017). The WRF model was initialized using meteorological fields from the Global Forecast System and was run during the OLYMPEX campaign (November 1<sup>st</sup>, 2015 to February 1, 2016). WRF parametrization and model setup are as described in Conrick and Mass (2019a, 2019b).

We evaluate the variable RAINNC which is the cumulative total accumulation of ice and liquid precipitation at the ground surface since the start of the model run. Specifically, 24-hour long simulations at 1.33km resolution were initialized at 175 00 and 12 UTC daily, with model output saved every 6 hours. We create a time series of precipitation based on accumulation during the first 12 hours of each model run. The first saved value of RAINNC provides a record of the 6-hr accumulated precipitation during the first 6 hours. To get accumulated precipitation during the second 6 hours of each model run we subtract the value of RAINNC recorded after 12 model hours from the value recorded after 6 model hours. We treat this time series as precipitation data without attempting to quantify model errors. We define a rain-shadow index,  $R_{WRF}$ , as the ratio of  $P_e$  and  $P_q$  180 obtained from the WRF output. We calculate an  $R_{WRF}$  for the whole accumulated precipitation during OLYMPEX. In order to characterize its variability in time, we also calculated  $R_{WRF}$  for every six-hour period for which  $P_e$  and  $P_q$  both exceeded 5 mm.

The time series of 6-hour  $R_{WRF}$  is compared to wind speed, wind direction, and temperature measurements collected by weather-balloon radiosondes during the OLYMPEX campaign with the goal of identifying relationships between rain- 185 shadow strength and atmospheric conditions. Radiosonde data were taken at KUIL (Figure 1b). KUIL, located in Quillayute, WA had 162 soundings from October 29, 2015 to January 16, 2016. Soundings were collected at variable heights, and we interpolated these to a defined spacing of 250 meters using linear interpolation. We averaged temperature, wind speed, and wind direction over an arbitrary one-kilometre vertical distance near the surface from 750 to 1750 meters for each sounding. These average values were interpolated from the times of observation to 6-hour time intervals of the WRF model using linear 190 interpolation.

### 2.1.3 Rain-shadow strength derived from river-discharge records

River-discharge data collected at gauges in the Quinault and Elwha rivers (Figure 1b) were obtained from the USGS (<https://waterdata.usgs.gov>). Discharge data was given as monthly averages measured in cubic feet per second. Complete data





195 from both basins was available from 1919 to 2019. We use river-discharge data to approximate the rain-shadow strength at two timescales: the entire period of record and each water year (October to September). We define  $E_{run}$  as the total runoff (i.e., discharge) divided by the area of the Elwha basin, and report the result in mm to compare with our precipitation estimates.  $Q_{run}$  is the same metric for the Quinault basin. We then have a gauge-based estimate of the rain-shadow index:

200

$$R_{GAUGE} = \frac{E_{run}}{Q_{run}} \quad (2)$$

For each of the 101 water years in the record we calculate water-year averages of  $E_{run}$ ,  $Q_{run}$ , and  $R_{GAUGE}$ .

We compared  $E_{run}$ ,  $Q_{run}$ , and  $R_{gauge}$  to climate indices. Monthly climate indices came from Climate Explorer  
205 (<https://climexp.knmi.nl>) and characterize recurring patterns of atmospheric circulation. These patterns influence the formation of mid-latitude storms and are also associated with significant temperature anomalies (e.g., Robertson and Metz, 1990; Michelangeli et al., 1995). The indices used here are derived from measurements of interannual sea-surface temperatures in the Pacific Ocean. We included four indices: the El-Nino Southern Oscillation (Nino 3.4; available from 1854-2021); the Pacific Decadal Oscillation (PDO; available from 1900-2021); the Pacific North American Index (PNA; available from 1950-  
210 2020); and the Tropical/Northern Hemisphere (TNH; available from 1950-2020). Each index was included because of its influence on the Northern-Hemisphere extratropics and the Pacific Northwest in particular. (Barnston and Livezey, 1987). These indices were averaged over December, January, and February (DJF) which is the period of greatest snowpack accumulation (Serreze et al., 1999; Robertson and Ghil, 1999). We normalize the time series of  $E_{run}$ ,  $Q_{run}$ , and  $R_{GAUGE}$  by their standard deviations and calculate Pearson's correlation coefficients ( $r$ ) between these time series.

215



## 2.2 Rain-Shadow Results

### 2.2.1 Long-term measurements of rain-shadow strength

The PRISM climatology (Figure 1b) yields  $R_{PRISM} = 0.54$  (Table 1), or approximately 85% more precipitation in the Quinault basin than the Elwha. We expect that there are significant local uncertainties in the PRISM climatology as it depends on the quality and spatial density of gauges used in the regression (Cao et al., 2018). 37 weather stations were used across the ~3700 km<sup>2</sup> Olympic Peninsula to derive the PRISM climatology, and only 3 sites of the 37 stations have an elevation above 500 meters. In the Coweeta basin in the southern Appalachian Mountains, local annual-mean errors in PRISM errors estimated at 16%, given 25 observation stations within the ~20 km<sup>2</sup> basin (Daly et al., 2017). In comparison, the lack of measurements of precipitation, especially at high elevations, in the Olympic Mountains suggests that errors significantly more than 16% are likely. Specifically, the lack of gauges in the Elwha headwaters means that PRISM does not measure spillover precipitation that crosses the divide to fall in the upper Elwha basin.

| Measure of $R$ | Source              | $R$ (Standard Deviation) | Period of Record                            |
|----------------|---------------------|--------------------------|---------------------------------------------|
| $R_{PRISM}$    | PRISM               | 0.54                     | 30-year climatology<br>(1981 - 2010)        |
| $R_{GAUGE}$    | USGS River          | 0.54                     | 1919 – 2019                                 |
|                | Discharge           | 0.54 (0.14)              | Individual water years                      |
| $R_{WRF}$      | OLYMPEX WRF-<br>ARW | 0.72                     | OLYMPEX campaign<br>11/01/2015 - 02/01/2016 |
|                |                     | 0.80 (0.36)              | 6-hour periods with precipitation           |

230 **Table 1.** Measures of  $R$  from PRISM, river discharge, and WRF datasets.



$R_{WRF}$  for the entire OLYMPEX campaign equals 0.72 (Table 1; Eq. (3), Figure 2). An  $R$  closer to one means precipitation is more similar in the Quinault and Elwha. WRF forecasts predicted significantly larger amounts of spillover precipitation in the Elwha basin than the PRISM normal. However, the WRF forecasts are imperfect: WRF underestimated precipitation by up to 100 mm at OLYMPEX gauge locations around the Quinault basin during larger storms (Conrick and Mass, 2019a). Additionally, the OLYMPEX campaign only studied a single wet season which may not have been representative of longer-term average precipitation.

A 101-year river discharge of the Elwha and Quinault basins yielded  $R_{GAUGE} = 0.54$  (Eq.5, Table 1), which is in agreement with  $R_{PRISM}$ . Uncertainty in discharge measurements and hence  $R_{GAUGE}$  can stem from several sources. For example, there is uncertainty in the measurements of the cross-sectional area of the flow and in the stage-discharge relationship. Additionally, river discharge represents water flowing off the land surface, neglecting the possibility of evapotranspiration of precipitation. The cool, wet climate of the Olympic Peninsula makes this error likely to be relatively small, but there could be systematic differences between the Quinault and Elwha in the conversion of precipitation to river discharge.

### 2.2.1 Temporal variability in rain-shadow strength

In addition to the average rain-shadow indices estimated using these three independent data sets, we also considered the variability in rain shadow index at timescales of hours and seasons. The six-hourly  $R_{WRF}$  values have a mean of 0.80 and standard deviation of 0.36 (Table 1). The mean rain-shadow index measured in this way is larger than the OLYMPEX-total  $R_{WRF}$  (=0.72), meaning that the 6-hourly forecast precipitation is more uniform across the mountain range than other data sets. We note that at a 6-hour resolution it is possible that the measured rain-shadow index could reflect differences in timing of precipitation in the two basins. For example, if the heaviest precipitation in the Elwha occurs after it happens in the Quinault, then, the rain shadow index might be larger in one 6-hour period and smaller in the subsequent 6-hour period with neither measure reflecting the storm event. Therefore, we averaged WRF forecasts over longer time periods to produce time series of  $R$  over a range of timescales. Over longer time periods, the mean value for  $R$  and the standard deviation of  $R$  gets smaller up to 48-hours (Table 2). For the longest time period examined, 72-hours, the standard deviation increases relative to 48-hours,



possibly reflecting less coherence in conditions at these longest timescales. For all timescales examined, however,  $R$  derived from WRF forecasts during OLYMPEX is larger than in other data sets. The larger  $R$  may reflect a tendency of WRF to overpredict spillover precipitation in the Elwha basin. However, we do not have sufficient data to conclude that this is necessarily the case. Moreover, PRISM is not informed by data collected near the drainage divide and so is not necessarily reliable. Similarly,  $R$  estimated from differences in river discharge is complicated by the existence of difference in evapotranspiration between the basins, if this is the case. Finally, it is possible that the OLYMPEX period was anomalous compared with longer-term records.

| Time period of measurement | $R$ (Standard Deviation) |
|----------------------------|--------------------------|
| 6-hours                    | 0.80 (0.36)              |
| 12-hours                   | 0.76 (0.30)              |
| 24-hours                   | 0.74 (0.31)              |
| 48-hours                   | 0.75 (0.26)              |
| 72-hours                   | 0.76 (0.33)              |

265 **Table 2.** Mean and standard deviation of  $R_{WRF}$  at different time intervals for accumulated precipitation.

What causes the time variability of the 6-hourly  $R_{WRF}$ ? Figure 2 compares the 6-hourly  $R_{WRF}$  to the average amount of precipitation. It shows that the rain-shadow strength for large events is less variable than for all rain events. Specifically, 6-hour periods with average precipitation totals above 20 mm tend to cluster at  $R$  values between 0.5 and 1.0, indicating that higher values of 6-hourly  $R_{WRF}$  are generally associated with lighter precipitation.

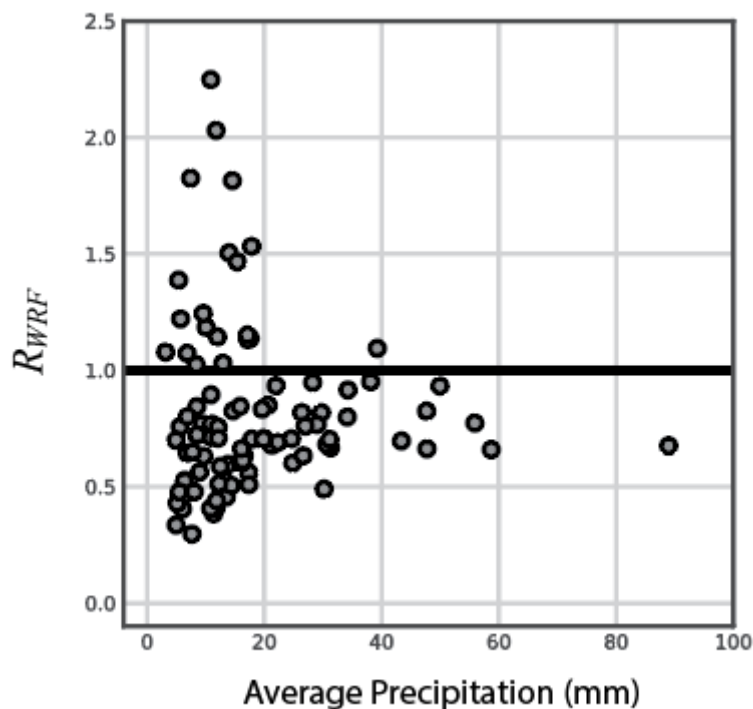

Figure 2.  $R_{WRF}$  measured at 6-hour intervals varies with the total precipitation averaged over the two basins. As average  
275 precipitation increases,  $R_{WRF}$  becomes less variable.

We analysed the time series of 6-hourly  $R_{WRF}$  to examine the relationships between R magnitude and temperature, wind speed, and wind direction (as measured by atmospheric soundings) (Figure 3). The time series can be divided into groups of low (0.34-0.69), moderate (0.70-0.99), and high (1.0-2.5) R. High R values (greater than one) were commonly observed  
280 during colder weather conditions (Figure 3a). On the other hand, lower R values were associated with warmer temperatures. High R events had lower magnitude precipitation compared to moderate R events, with rates of approximately 14 millimeters per 6-hour interval and 26 millimeters per 6-hour interval, respectively. The wind speed during cold, high-R events was slower compared to low- and moderate-R events (Figure 3b), while wind direction showed no significant pattern among the different R groups (Figure 3c). In general, the temporal variability of  $R_{WRF}$  suggests that colder conditions and slower winds lead to



285 lower magnitude and more uniform precipitation, while warmer and windier conditions are linked to  $R$  values close to the  
long-term average. Small magnitude precipitation events with  $R$  values below 0.5 occurred during warm and windy conditions.

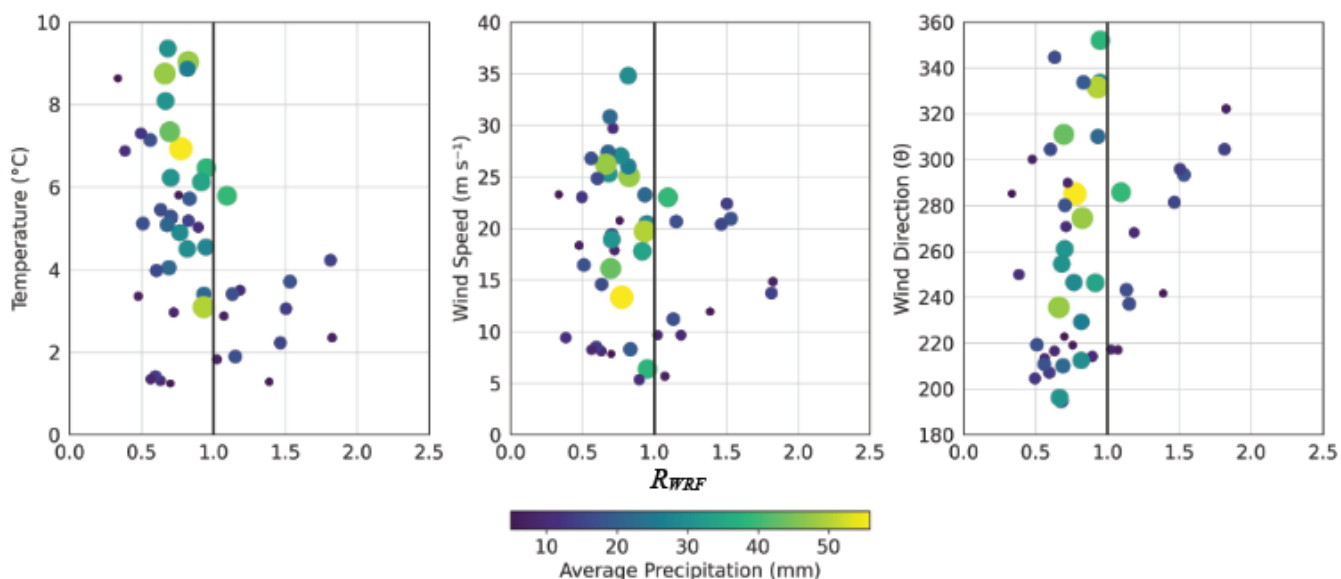

290 Figure 3. The relationship between  $R_{WRF}$  at 6-hour resolution, and various atmospheric variables as measured by the KUIL  
radiosonde. The size and colour of the data points correspond to the average precipitation across both basins.

We used discharge records to examine differences in rain-shadow strength in different water years. The annual time series of  $R_{GAUGE}$  has a mean value of 0.54, with a standard deviation of 0.14 (Table 1). We compared the time series of  $R_{GAUGE}$ ,  $E_{run}$ , and  $Q_{run}$  to climate indices to determine if temporal variability in  $R$  is correlated with specific climate patterns, for example, La Niña vs. El Niño. Instead, we find that there is a remarkably consistent relationship between  $Q_{run}$  and  $E_{run}$  ( $r = 0.98$ ) and the climate indices do not strongly correlate with  $E_{run}$ ,  $Q_{run}$  or  $R_{GAUGE}$ . (Figure 4). Our analysis demonstrates that river discharge varies synchronously on the windward and leeward sides of the mountain range. This suggests that topography, and possibly differences in evapotranspiration, strongly influence the rain shadow strength at the timescale of entire wet seasons.



300

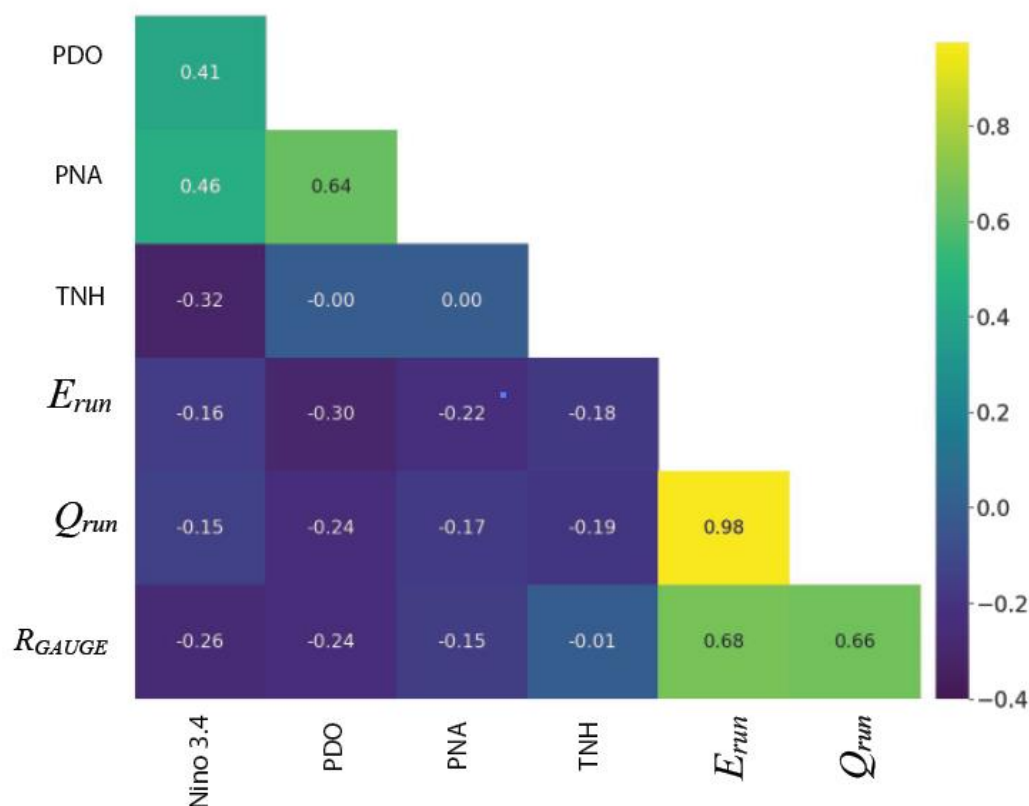

Figure 4. A correlation heat map displaying the relationship between various climate indices and  $E_{run}$ ,  $Q_{run}$  or  $R_{GAUGE}$ .  $E_{run}$  and  $Q_{run}$  are highly correlated with each other and  $R_{GAUGE}$  is not correlated with climate indices.

305

### 2.3 Inferences for reconstruction of past climate

Three independent data sets give us  $R$  of  $\sim 0.5$  to  $\sim 0.7$  with less variability in  $R$  at longer timescales. At the shortest timescales examined (6-hours), the largest deviations in  $R$  are values larger than 1 occurring during periods of cold, slow windspeeds, and light-precipitation. There is no example of a large precipitation event with  $R$  much less than 0.5 during the

310 OLYMPEX campaign. At the timescale of water years,  $R$  is uncorrelated with regional climate indices and river discharge



varies synchronously between the Quinault and Elwha basins. The lack of variability in  $R$  at the water-year timescale, the lack of correlation of  $R$  with climate indices, and the small number and magnitude of low  $R$  events at the 6-hour time scale all suggest that a conservative minimum estimate of  $R$  in the Olympic Mountains during the last glacial period is 0.5. The most likely difference between the modern and glacial climate suggested by our data would be an increase in  $R$  (i.e., a more uniform climate) due to cooler conditions (Figure 3). We proceed, therefore, to explore how the current rain-shadow strength would have impacted glacier dynamics on the Olympic Peninsula.

### 3. Modelled Glacier Extent in the Quinault and Elwha basins

#### 3.1 Glacier Flowline Model Methods

We use a flowline model based on that of Oerlemans (1997) adapted from Roe and O'Neal (2009) to approximate the dynamics of glaciers in the Quinault and Elwha basins. The model is one-dimensional but considers the effect of changes in valley width in considering mass conservation along the flowline. We follow the work of Roe and O'Neal (2009) by calculating the mass balance along the flowline as a function of precipitation and temperature, instead of imposing a specified vertical mass-balance gradient. Inputs to the model include valley geometry, initial ice thickness, sea-level temperature, atmospheric lapse rate, and precipitation rate. The horizontal grid spacing in the model is 500 m.

Valley geometry is idealized as a long profile with a valley floor of defined width and valley sidewalls sloping outward at a fixed angle above the valley floor. The Quinault and Elwha basins have different morphology and hypsometry (Figure 5) which is likely to affect glacier dynamics. For simplicity, the geometry of each basin was idealized using three segments with uniform width and valley angles for each segment with the valley-floor elevation defined by the elevation of the lowest part of the valley extracted from a 30m digital elevation model (Table 3). We make no attempt to remove glacial and post-glacial sediment from the valleys before extracting the long profile. Where the valleys are wide, the valley side walls are assumed to be vertical. Within narrow sections we define the angle at which valley walls slope outward. Both valleys start with a wide contributing area in the high headwaters. In the middle of each basin, there is a narrow notch. Below the notches, the basins open into expansive coastal plains. Basin widths were chosen to approximate upstream area accumulation along the long profile.



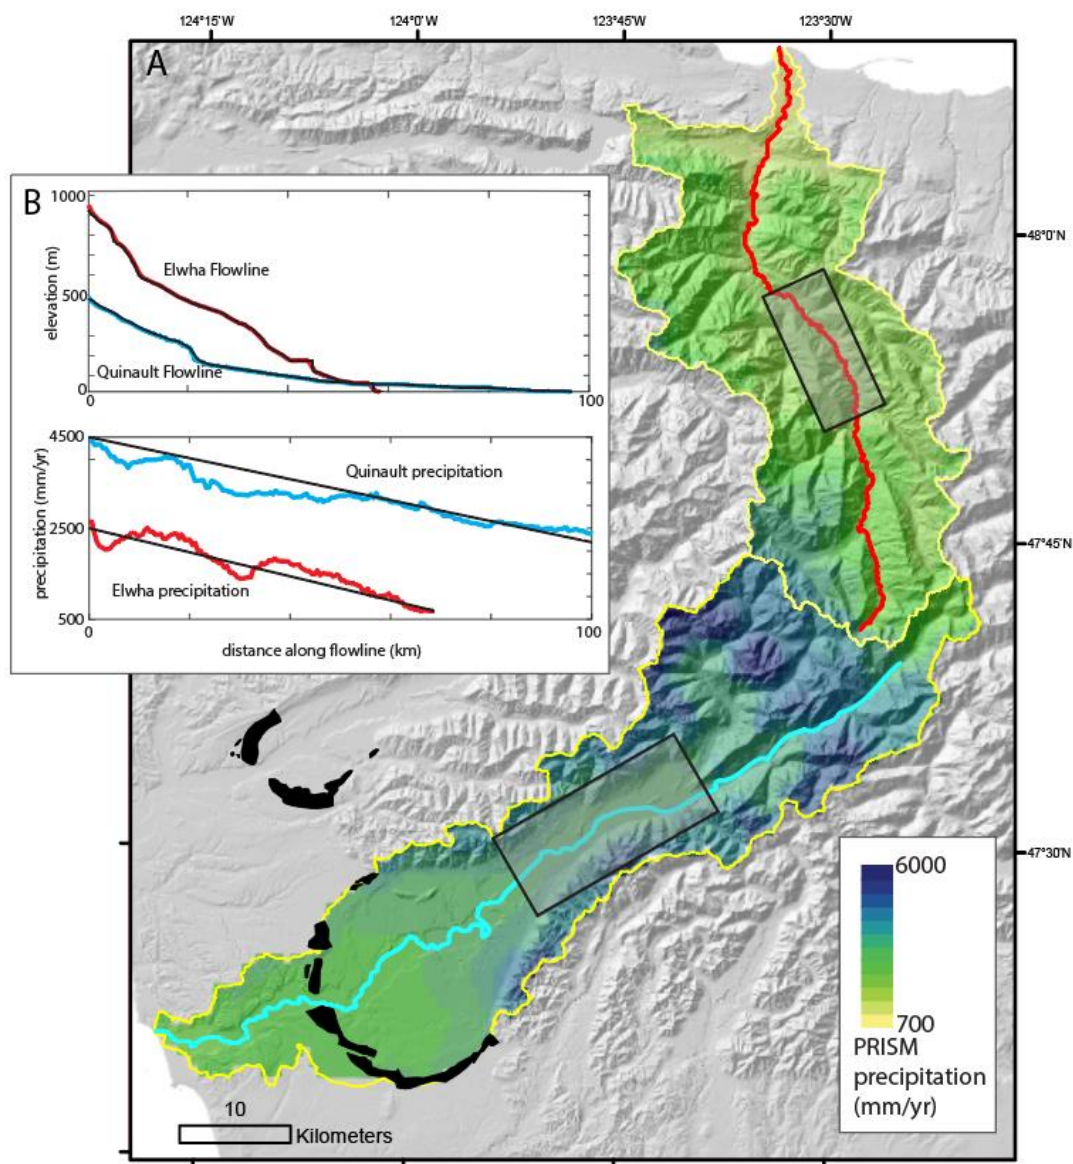

335

Figure 5: Panel A shows the Quinault and Elwha basins with topography represented as a grey hillshade and the 30-year climatological annual precipitation in  $\text{mm yr}^{-1}$  shown by the colour bar. Red (Elwha) and Cyan (Quinault) lines trace the path of the flowlines modelled. Grey-shaded boxes are regions where the valleys narrow. Panel B shows the elevation and precipitation along these flowlines with the coloured lines showing the data from the digital elevation model (DEM) and

340 PRISM model and the black lines showing the approximate values used in our model.



| Basin Segment   | Elevation Range (m) | Valley Width (km) | Valley sidewall angle (°) |
|-----------------|---------------------|-------------------|---------------------------|
| Upper Quinault  | 500-115             | 16.0              | 0 (vertical)              |
| Middle Quinault | 115-60              | 2.5               | 60                        |
| Lower Quinault  | 60-0                | 18                | 0                         |
| Upper Elwha     | 1600-450            | 11.4              | 0                         |
| Middle Elwha    | 450-70              | 5.2               | 50                        |
| Lower Elwha     | 70-0                | 15.0              | 0                         |

Table 3: Elwha and Quinault valley geometry parameterization for the one-dimensional flowline model.

345

Mass balance of the glacier varies along its length as a function of spatially variable precipitation and temperature.

Temperature ( $T$ ) varies along the length of the flowline ( $x$ ), and is a function of elevation of the ice surface and an imposed sea-level temperature,  $T_{SL}$ :

350

$$T(x) = T_{SL} + \gamma(zb(x) + h(x)) \quad (3)$$

where  $\gamma$  is the atmospheric lapse rate, here chosen as  $-8.5e-3 \text{ K m}^{-1}$ ,  $zb(x)$  is the elevation of the bed and  $h(x)$  is the thickness of the ice. Precipitation decreases down valley in both basins, and is generally lower in the Elwha basin (Figure 5). We idealize this variability by setting a precipitation rate at the top of the basin and imposing a fixed fractional decrease in precipitation from the top to the bottom of each valley. For the Elwha we assume precipitation at the valley mouth is 27% of that of the valley top. For the Quinault, we assume precipitation at the valley mouth is 44% of that at the valley top. These fractions were chosen to approximate the modern spatial pattern in precipitation (Figure 5). To simulate a glacial climate, we make the climate drier than modern by imposing a glacial drying factor ( $GDF$ ) less than 1. The idealized modern precipitation gradient is multiplied by the  $GDF$  to model a drier climate that maintains the down-valley precipitation gradient observed today. We



360 compare modelled glaciation of the Elwha and Quinault basins with the same  $T_{SL}$  and  $GDF$  to assess the response of the  
different basins to the same climate forcing.

Modelled temperature and precipitation are used to calculate mass balance along the flowline. **Precipitation is  
assumed to be adding mass throughout time and across the entire glacier surface.** Temperature dependent melting is assumed  
to be the only loss of mass and is calculated as:

365

$$melt(x) = \text{maximum}(0, \mu T(x)) \quad (4)$$

**where  $\mu$  is a constant melt factor set to  $0.65 \text{ m yr}^{-1}\text{C}^{-1}$ .** From this we calculate a spatially variable mass balance,  $b(x)$  in  $\text{m yr}^{-1}$ ,  
as:

370

$$b(x) = P(x) - melt(x)$$

(5)

With mass balance calculated, we follow the method of Oerlemans (1997) as implemented by Roe and O'Neal (2009)  
375 and Stuart-Smith et al. (2021) to solve the nonlinear diffusion equation governing the height of the ice over time. We choose  
a fixed value of  $1.9\text{e-}24 \text{ Pa}^{-3} \text{ s}^{-1}$  as the parameter controlling internal deformation and  $5.7\text{e-}20 \text{ Pa}^{-3} \text{ m}^2 \text{ s}^{-1}$  as the sliding  
parameter, based on values used in Oerlemans (1997). **The model requires ice to be present at the beginning of simulations.**  
Therefore, we start with glaciers of the expected scale and use a large glacier near the terminal moraine for the initial condition  
for the Quinault basin and use a small initial glacier limited to the headwaters in the Elwha basin. **The model is implemented**  
380 **in Matlab and the model code and basin geometry input files are publicly available at**  
<https://www.hydroshare.org/resource/a908fe06d4784684b68452d21efae69b/>.



### 3.2 Results of glacier flowline modelling

We begin by finding the range of climate conditions that produce a modelled Quinault glacier in equilibrium at the  
385 observed last glacial maximum extent (Figure 1a). Through trial and error, we find pairs of  $T_{SL}$  and glacial drying factor ( $GDF$ )  
that produce an equilibrium glacier at the terminal moraine.  $T_{SL}$  and  $GDF$  linearly trade off ( $GDF = 0.10 T_{SL} - 0.55$ ) within the  
range of sea level temperatures between 7 and 11°C supported by paleoclimate reconstructions (Heusser et al., 1999). For a  
chosen value of  $T_{SL}$ , we can find the percentage of precipitation ( $GDF$ ) that forces the glacier to stay in equilibrium near its  
terminal moraines over a 5,000-year period. Encouragingly, the corresponding  $GDF$  values (~0.15-0.55) are similar to the  
390 required drying of at least 0.33 implied by the paleoclimate record.

Having found equilibria for the Quinault glacier, we use the same climate  $T_{SL}$  and  $GDF$  pairs to simulate the evolution  
of the Elwha glacier. Pairs of climate variables that produced nearly identical equilibrium glaciers in the Quinault led to  
enormously different glaciers in the Elwha basin. At the hotter end of the climate range at 10.5°C the Elwha glacier reaches a  
steady state with a high-elevation terminus consistent with the most likely true behaviour of the Elwha glacier during the most-  
395 recent glaciation. However, for a cooler climate at 9.5°C the Elwha glacier advances far down valley onto the coastal plain  
(Figure 6). The Elwha glacier advances from the headwaters into the narrower portion of the valley about 25 km from the  
divide. The glacier thickens due to the abrupt change in cross-sectional area. **The thickening causes the surface of the ice to be  
at higher elevations. This increases the accumulation area of the glacier. A larger accumulation area causes glacier growth and  
further increases in glacier elevation.** The occurrence of this ice-elevation feedback for the Elwha glacier is extremely sensitive  
400 to climate conditions across a range of climate conditions that produces little change to the Quinault glacier.

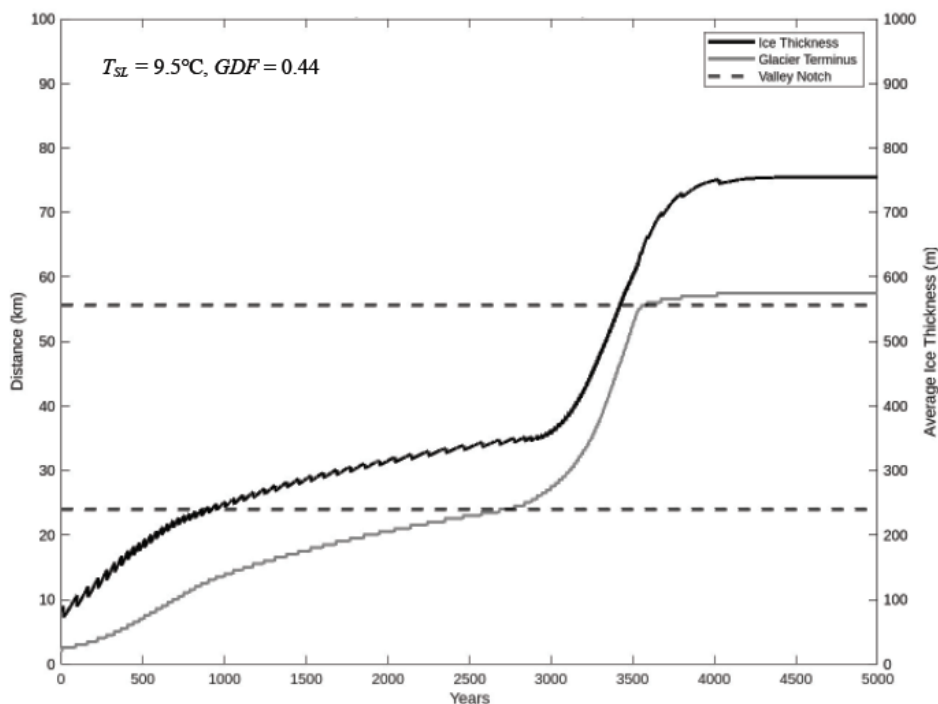

Figure 6. The temporal evolution of the Elwha glacier terminus and ice thickness for  $T_{SL} = 9.5^{\circ}\text{C}$  and  $GDF = 0.44$ . These  
405 climate factors yield an equilibrium Quinault glacier at its terminal moraine position. As the Elwha glacier terminus (grey line)  
advances into the narrow section of the valley (distance of approximately 23 to 56 km shown on left axis) just before 3000  
years into the simulation, the ice thickness (black line) increases rapidly, initiating an ice-elevation feedback. Upon reaching  
the other side of the valley notch, the glacier reaches a state of equilibrium, where the rates of accumulation and ablation are  
roughly equal. It is important to note that this ice-elevation feedback is not observed in all climate simulations, but is more  
410 likely to occur in cooler and drier conditions, as well as in basins with valley geometries similar to that of the Elwha.



### 3.3 Discussion of flowline model results

We observe that the Elwha glacier model experiences an ice-elevation feedback that is associated with the geometry of the basin. The initiation of the feedback occurs when the glacier advances into the narrow section of the valley (notch) where it begins to thicken (Figure 6). The Quinault basin also has a narrow segment of the valley in the middle of the basin; therefore, we expect to see a similar ice-elevation feedback occurring in this valley. To investigate this possibility, we ran a limited set of models with an initially small Quinault glacier. In some simulations, this glacier grew large enough to advance through the narrowing of the valley. It thickened and extended, demonstrating an ice-elevation feedback similar to that we observed in the Elwha simulations. However, a limited search of parameter space did not reveal any equilibrium state for a small Quinault glacier. When we begin the simulation with a small glacier in the headwaters of the Quinault valley it either melts completely or advances through the narrowing of the valley to become a large glacier. We conclude that the higher elevation headwaters of the Elwha allow a smaller equilibrium glacier which is not possible in the idealized Quinault basin geometry which extends only to ~600 meters elevation, while our reconstructed ELA is ~1000 meters.

The geometry of the basins is not the only control on the glacier extent. We ran a set of simulations switching the basin geometry. That is, we ran the Quinault climate over the Elwha basin geometry and vice versa. The Elwha glacier was consistently large when given Quinault precipitation rates. The Quinault glacier ablated away or grew large when given the Elwha precipitation rates. This indicates that the contrast in precipitation amount, rather than the basin morphology, is the main cause of different behaviour of the Quinault glacier and Elwha glacier in our models.

If we assume that geologic mapping of the Elwha basin has correctly identified the limited extent of recent glaciation, we can interpret our results as demonstrating that precipitation gradients are sufficient to explain glacier asymmetry if the past climate was at the warm and wet end of the range of paleoclimate estimates. However, the basin geometry and sensitivity of the Elwha glacier to climate variability within a plausible range suggests that large-scale glaciation of the basin during the Quaternary must be considered as a possibility.

In our model we have neglected other spatially variable surface processes that could have influenced the extent of the Elwha glacier. Specifically, we did not account for the separate influences that precipitation-type, cloudiness, humidity, and sublimation would have on glacier accumulation and melt. In the model, we did not discriminate between different types of



precipitation. All precipitation was considered snow. Rain has a significant impact on glacial melt rates and could influence the mass balance of the glaciers (Oltmanns et al., 2019). The larger precipitation totals in the Quinault suggest that this effect could be more important for this glacier than for the Elwha. Cloudiness modulates the amount of solar radiation that reaches a glacier's surface. We expect that the same physics that creates the rain shadow should produce coherent special patterns in cloudiness in the Olympic Mountains. Clouds condense on the windward side of the range due to orographic lifting, and then evaporate when they descend on the leeward side of the mountain range (Roe, 2005). During some precipitation events, clouds are observed to decrease in elevation and water content rapidly near the divide between the Quinault and Elwha basins (Zagrodnik et al., 2019). If the Elwha valley is less cloudy than the Quinault, we expect that more solar radiation would increase local air temperatures and enhance glacier melt (Huss et al., 2009). Additionally, there could be spatial patterns in humidity that influence glacier mass balance. If the Elwha valley is systematically less humid, we expect that the lapse rate should be larger than in the wetter Quinault.

We conducted a small number of experiments to determine the sensitivity of the modelled Elwha glacier to our choice for the melt factor. For the simulation shown in Figure 6, if we increase the melt factor slightly from  $0.65 \text{ m yr}^{-1} \text{ K}^{-1}$  to  $0.75 \text{ m yr}^{-1} \text{ K}^{-1}$  the Elwha glacier remains small. For reference, the melt factor measured at various modern glaciers and ice sheets shows variability of at least a factor of 2-3 (Braithwaite and Yang, 2000). The melt factor for Blue Glacier, on the west side of the Olympic Mountains, was estimated using glacier area change and PRISM-based temperature and precipitation data (Fountain et al., 2022). Field measurements could constrain the melt factor in the eastern Olympics to assess the potential for enhanced melt in the Elwha relative to the Quinault. Future work could establish if climatological variability in cloudiness is equivalent to this degree of difference in the melt factor relative to the Quinault. A role for lapse-rate variability could also be explored.

While we defend our analysis of the modern climate and our reasonable assumption that the past spatial gradient in precipitation in the Olympics was similar to that observed today, it is possible that precipitation events during the last glacial do not have analogs in the modern climate. One way to assess this possibility would be to use a forecasting model like WRF with boundary conditions pulled from global circulation models of the last glacial maximum. These simulations could reveal different mechanisms of precipitation variability than those that operate today.



Any assessment of erosion by glaciers on the Olympic Peninsula requires a clear picture of glacier extent through time. We could model glacial erosion in the Quinault basin by simulating the advance and retreat of the Quinault glacier through a glacial cycle and integrating basal sliding. The spatial pattern of glacier sliding within the Quinault could be compared to gradients in exhumation across the range and fluvial erosion within the Clearwater valley. Glacial erosion of the Elwha valley depends on the extent of ice. If the Elwha glacier remained small during the last glacial episode, then glacial erosion was limited and perhaps fluvial erosion was a stronger control on landscape-scale erosion on the lee side of the range. However, if an expansive and thick glacier ever occupied the Elwha valley, our models suggest it would have been very fast flowing and erosive – more so than the Quinault glacier.

Future field work could improve understanding of the past extent of the Elwha glacier. One target would be to find terminal moraines associated with the Elwha valley glacier during the most recent glaciation, presumably located up valley from the mapped quadrangles near the valley mouth. If these are above the notch, they would improve our confidence in the model simulations. In the lower Elwha valley, drill cores could be recovered and analysed to identify the extent of locally derived (alpine) till. It is possible that alpine till from previous glaciations could be identified from the mineralogy and chemistry – allowing us to constrain past glacier extent.

#### 4 Conclusions

We set out to understand the factors influencing the asymmetry in glacier extent between the Quinault and Elwha basins of the Olympic Mountains. To this end, we characterized the modern precipitation patterns, and assessed the potential influence of various climate indices on these patterns. We calculated ratios of average precipitation in the Elwha basin relative to the Quinault basin using three different datasets: PRISM data, river discharge data, and WRF model output. We conclude that the long-term ratio of average precipitation between the two basins likely remained at-or-above 0.50 (<100% more precipitation in the Quinault than the Elwha) during recent glaciations. We find no evidence of atmospheric or climatic influences, such as weather regimes, that would cause a more severe precipitation gradient in a glacial climate. Therefore, we make the conservative assumption that modern climate is a good representation of past spatial gradients in precipitation.



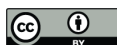

To better understand the response of glaciers in the region to climate, we employed a one-dimensional glacier flowline model simulating the response of glaciers in both basins to a range of climate states. This included variations in sea level temperature ( $T_{SL}$ ) and the glacial drying factor ( $GDF$ ). There exists a set of  $T_{SL}$  and  $GDF$  pairs within the expected paleoclimate range that produce an equilibrium ice margin in the Quinault valley at the position of the last glacial maximum terminal moraine. Over this same set of climate conditions, the Elwha glacier showed extremely variable behaviour. Within the Quinault equilibrium climate range, a  $1^{\circ}\text{C}$  change in temperature corresponded to an expansion of nearly 40 km in the Elwha glacier. Further investigation revealed that this behaviour was related to the valley geometry of the Elwha basin, with the glacier experiencing an ice-elevation feedback as it advanced into the narrowing section of the valley and thickened. This ice-elevation feedback occurs in both the Quinault and Elwha basins, but is more pronounced in cooler and drier climates. In general, our model was able to reproduce the observed extent of glaciers in warmer climates with higher rates of precipitation. The occurrence of an ice-elevation feedback in both basins, which was linked to the valley geometry, highlights the importance of considering local topography in studies of glacier dynamics.

Our model focused on glacier asymmetry due to the asymmetry in precipitation, and did not consider differences in the efficiency of melting across the Olympic mountains. Our parameter tests suggest that if melt efficiency was even slightly greater in the Elwha relative to the Quinault, it could have been a significant factor the limiting growth of the Elwha glacier during the last glacial episode. Further investigation with the flowline model could examine the impact of spatial variability in glacier melting.

Overall, we find that spatially variable precipitation influences glacier extent, and that the sensitivity of glaciers to climate varies in space for the Olympic Mountains. This conclusion has implications for other regions with spatial gradients in precipitation including, the Andes Mountains, the European Alps, the Southern Alps, and Central Asia. Specifically, we suggest that glacier sensitivity to climate likely varies across precipitation gradients forced by topography. Furthermore, the local spatial variability in the relationship between glaciers and climate complicates a prediction of the response of glaciers to ongoing anthropogenic climate change as small changes in climate may have different impacts for different glaciers within the same mountain range. Considering the complex interplay between local topography and climate, it is necessary to take into



510 account these spatial gradients in future climate projections for accurate predictions of individual glacier behaviour in mountainous regions.

### Code Availability

A MATLAB version of the glacier flowline model can be accessed through a hydroshare resource:  
515 <https://www.hydroshare.org/resource/fe28143081434b0d90f8cffc88e1bfff/> (last access: 10 February 2023).

### Data Availability

Data related to the climate analysis of the Olympic Mountains can be accessed through a hydroshare resource:  
<https://www.hydroshare.org/resource/0ae232525f984007ba96c1762f21dd3d/> (last access: 10 February 2023).

520

### Author Contributions

AM and AA wrote the paper. AA initiated the study. RC supplied WRF model output and developed code to analyse atmospheric weather balloon soundings. GR supplied the flowline model code. AM and AA performed the analysis of the climate and performed the flowline model simulations. All authors checked and revised the text and the figures of the paper  
525 and contributed to the ideas developed in this study.

### Competing Interests

The authors declare that they have no conflict of interest.

### 530 Acknowledgements

We are grateful to Cristian Proistosescu and [BLANK] for their constructive comments on this manuscript.



## References

- 535 Adams, B. A. and Ehlers, T. A.: Tectonic controls of Holocene erosion in a glaciated orogen, *Earth Surface Dynamics*, 6, 595–610, <https://doi.org/10.5194/esurf-6-595-2018>, 2018.
- Anders, A. M., Roe, G. H., Durran, D. R., and Minder, J. R.: Small-Scale Spatial Gradients in Climatological Precipitation on the Olympic Peninsula, *Journal of Hydrometeorology*, 8, 1068–1081, <https://doi.org/10.1175/JHM610.1>, 2007.
- 540 Anders, A. M., Mitchell, S. G., and Tomkin, J. H.: Cirques, peaks, and precipitation patterns in the Swiss Alps: Connections among climate, glacial erosion, and topography, *Geology*, 38, 239–242, <https://doi.org/10.1130/G30691.1>, 2010.
- Barnston, A. G. and Livezey, R. E.: Classification, Seasonality and Persistence of Low-Frequency Atmospheric Circulation Patterns, *Monthly Weather Review*, 115, 1083–1126, [https://doi.org/10.1175/1520-0493\(1987\)115<1083:CSAPOL>2.0.CO;2](https://doi.org/10.1175/1520-0493(1987)115<1083:CSAPOL>2.0.CO;2), 1987.
- 545 Braithwaite, R. J. and Zhang, Y.: Sensitivity of mass balance of five Swiss glaciers to temperature changes assessed by tuning a degree-day model, *Journal of Glaciology*, 46, 7–14, <https://doi.org/10.3189/172756500781833511>, 2000.
- 550 Braithwaite, R. J., Zhang, Y., & Raper, S. C. B.: Temperature sensitivity of the mass balance of mountain glaciers and ice caps as a climatological characteristic. *Zeitschrift für Gletscherkunde und Glazialgeologie*, 38(1), 35–61, 2003.
- Brandon, M. T., Roden-Tice, M. K., and Garver, J. I.: Late Cenozoic exhumation of the Cascadia accretionary wedge in the Olympic Mountains, northwest Washington State, *GSA Bulletin*, 110, 985–1009, [https://doi.org/10.1130/0016-7606\(1998\)110<0985:LCEOTC>2.3.CO;2](https://doi.org/10.1130/0016-7606(1998)110<0985:LCEOTC>2.3.CO;2), 1998.
- 555 Cao, Q., Painter, T. H., Currier, W. R., Lundquist, J. D., and Lettenmaier, D. P.: Estimation of Precipitation over the OLYMPEX Domain during Winter 2015/16, *Journal of Hydrometeorology*, 19, 143–160, <https://doi.org/10.1175/JHM-D-17-0076.1>, 2018.
- 560 Conrick, R. and Mass, C. F.: An Evaluation of Simulated Precipitation Characteristics during OLYMPEX, *Journal of Hydrometeorology*, 20, 1147–1164, <https://doi.org/10.1175/JHM-D-18-0144.1>, 2019b.



- 565 Conrick, R. and Mass, C. F.: Evaluating Simulated Microphysics during OLYMPEX Using GPM Satellite Observations,  
Journal of the Atmospheric Sciences, 76, 1093–1105, <https://doi.org/10.1175/JAS-D-18-0271.1>, 2019a.
- Daly, C., Slater, M. E., Roberti, J. A., Laseter, S. H., and Swift Jr, L. W.: High-resolution precipitation mapping in a  
mountainous watershed: ground truth for evaluating uncertainty in a national precipitation dataset, International Journal of  
Climatology, 37, 124–137, <https://doi.org/10.1002/joc.4986>, 2017.
- 570 Daly, C., Halbleib, M., Smith, J. I., Gibson, W. P., Doggett, M. K., Taylor, G. H., Curtis, J., and Pasteris, P. P.:  
Physiographically sensitive mapping of climatological temperature and precipitation across the conterminous United States,  
Int. J. Climatol., 28, 2031–2064, <https://doi.org/10.1002/joc.1688>, 2008.
- 575 Duda, J. J., Warrick, J. A., and Magirl, C. S.: Coastal Habitats of the Elwha River, Washington: Biological and Physical  
Patterns and Processes Prior to Dam Removal, U.S. Department of the Interior, U.S. Geological Survey, 276 pp., 2011.
- Fountain, A. G., Gray, C., Glenn, B., Menounos, B., Pflug, J., and Riedel, J. L.: Glaciers of the Olympic Mountains,  
Washington—The Past and Future 100 Years, Journal of Geophysical Research: Earth Surface, 127, e2022JF006670,  
580 <https://doi.org/10.1029/2022JF006670>, 2022.
- Heusser, C. J., Heusser, L. E., and Peteet, D. M.: Humptulips revisited: a revised interpretation of Quaternary vegetation and  
climate of western Washington, USA, Palaeogeography, Palaeoclimatology, Palaeoecology, 150, 191–221,  
[https://doi.org/10.1016/S0031-0182\(98\)00225-9](https://doi.org/10.1016/S0031-0182(98)00225-9), 1999.
- 585 Organization and structure of clouds and precipitation on the mesoscale and microscale in cyclonic storms:  
<https://agupubs.onlinelibrary.wiley.com/doi/abs/10.1029/RG016i004p00741>, last access: 3 January 2023.
- Hobbs, P.V.: Organization and structure of clouds and precipitation on the mesoscale and microscale in cyclonic storms,  
590 Reviews of Geophysics 16(4), 741-755, <https://doi.org/10.1029/RG016i004p00741>, 1978.
- Houze, R. A., McMurdie, L. A., Petersen, W. A., Schwaller, M. R., Baccus, W., Lundquist, J. D., Mass, C. F., Nijssen, B.,  
Rutledge, S. A., Hudak, D. R., Tanelli, S., Mace, G. G., Poellot, M. R., Lettenmaier, D. P., Zagrodnik, J. P., Rowe, A. K.,  
DeHart, J. C., Madaus, L. E., Barnes, H. C., and Chandrasekar, V.: The Olympic Mountains Experiment (OLYMPEX), Bulletin  
595 of the American Meteorological Society, 98, 2167–2188, <https://doi.org/10.1175/BAMS-D-16-0182.1>, 2017.



- Huss, M., Funk, M., and Ohmura, A.: Strong Alpine glacier melt in the 1940s due to enhanced solar radiation, *Geophysical Research Letters*, 36, <https://doi.org/10.1029/2009GL040789>, 2009.
- 600 Kessler, M. A., Anderson, R. S., and Stock, G. M.: Modeling topographic and climatic control of east-west asymmetry in Sierra Nevada glacier length during the Last Glacial Maximum, *Journal of Geophysical Research: Earth Surface*, 111, <https://doi.org/10.1029/2005JF000365>, 2006.
- Marshall, K. J.: Expanded Late Pleistocene Glacial Chronology for Western Washington, U.S>A. And the Wanaka-Hawea  
605 Basin, New Zealand, Using Luminescence Dating of Glaciofluvial Outwash, M.S. Thesis, Idaho State University, Pocatello, ID, USA, 357 pp., <https://isu.app.box.com/v/Marshall-2013>, 2013.
- Michel, L., Ehlers, T. A., Glotzbach, C., Adams, B. A., and Stübner, K.: Tectonic and glacial contributions to focused  
610 exhumation in the Olympic Mountains, Washington, USA, *Geology*, 46, 491–494, <https://doi.org/10.1130/G39881.1>, 2018.
- Michelangeli, P.-A., Vautard, R., and Legras, B.: Weather Regimes: Recurrence and Quasi Stationarity, *Journal of the Atmospheric Sciences*, 52, 1237–1256, [https://doi.org/10.1175/1520-0469\(1995\)052<1237:WRRMQS>2.0.CO;2](https://doi.org/10.1175/1520-0469(1995)052<1237:WRRMQS>2.0.CO;2), 1995.
- Minder, J. R., Durran, D. R., Roe, G. H., and Anders, A. M.: The climatology of small-scale orographic precipitation over the  
615 Olympic Mountains: Patterns and processes, *Quarterly Journal of the Royal Meteorological Society*, 134, 817–839, <https://doi.org/10.1002/qj.258>, 2008.
- Nino3.4 index based on NOAA ERSSTv5: [https://climexp.knmi.nl/data/iersst\\_nino3.4a.dat](https://climexp.knmi.nl/data/iersst_nino3.4a.dat), last access: 20 December 2022
- 620 Oerlemans, J.: Climate Sensitivity of Franz Josef Glacier, New Zealand, as Revealed by Numerical Modeling, *Arctic and Alpine Research*, 29, 233–239, <https://doi.org/10.2307/1552052>, 1997.
- Oerlemans, J., Anderson, B., Hubbard, A., Huybrechts, P., Jóhannesson, T., Knap, W. H., Schmeits, M., Stroeven, A. P., van de Wal, R. S. W., Wallinga, J., and Zuo, Z.: Modelling the response of glaciers to climate warming, *Climate Dynamics*, 14,  
625 267–274, <https://doi.org/10.1007/s003820050222>, 1998.
- Oltmanns, M., Straneo, F., and Tedesco, M.: Increased Greenland melt triggered by large-scale, year-round cyclonic moisture intrusions, *The Cryosphere*, 13, 815–825, <https://doi.org/10.5194/tc-13-815-2019>, 2019.
- 630 Pacific/North American Pattern (PNA): [https://climexp.knmi.nl/data/icpc\\_pna.dat](https://climexp.knmi.nl/data/icpc_pna.dat), last access: 20 December 2022



Pacific Decadal Oscillation index (PDO): <https://climexp.knmi.nl/data/ipdo.dat>, last access: 20 December 2022

635 Pazzaglia, F. J. and Brandon, M. T.: A Fluvial Record of Long-term Steady-state Uplift and Erosion Across the Cascadia  
Forearc High, Western Washington State, American Journal of Science, 301, 385–431, <https://doi.org/10.2475/ajs.301.4-5.385>, 2001.

640 Polenz, M., Wegmann, K. W., and Schasse, H. W.: Geologic Map of the Elwha and Angeles Point 7.5-minute Quadrangles,  
Clallam County, Washington, [https://www.dnr.wa.gov/publications/ger\\_ofr2004-14\\_geol\\_map\\_elwha\\_angelespoint\\_24k.pdf](https://www.dnr.wa.gov/publications/ger_ofr2004-14_geol_map_elwha_angelespoint_24k.pdf),  
2004.

PRISM 30-Year Normals: <https://prism.oregonstate.edu/normals/>, last access: 05 October 2020

645 Purnell, D. J. and Kirshbaum, D. J.: Synoptic Control over Orographic Precipitation Distributions during the Olympics  
Mountains Experiment (OLYMPEX), Monthly Weather Review, 146, 1023–1044, <https://doi.org/10.1175/MWR-D-17-0267.1>, 2018.

650 Riedel, J. L., Wilson, S., Baccus, W., Larrabee, M., Fudge, T. J., and Fountain, A.: Glacier status and contribution to streamflow  
in the Olympic Mountains, Washington, USA, Journal of Glaciology, 61, 8–16, <https://doi.org/10.3189/2015JoG14J138>, 2015.

Robertson, A. W. and Ghil, M.: Large-Scale Weather Regimes and Local Climate over the Western United States, Journal of  
Climate, 12, 1796–1813, [https://doi.org/10.1175/1520-0442\(1999\)012<1796:LSWRAL>2.0.CO;2](https://doi.org/10.1175/1520-0442(1999)012<1796:LSWRAL>2.0.CO;2), 1999.

655 Robertson, A. W. and Metz, W.: Transient-Eddy Feedbacks Derived from Linear Theory and Observations, Journal of the  
Atmospheric Sciences, 47, 2743–2764, [https://doi.org/10.1175/1520-0469\(1990\)047<2743:TEFDL>2.0.CO;2](https://doi.org/10.1175/1520-0469(1990)047<2743:TEFDL>2.0.CO;2), 1990.

Roe, G. H.: OROGRAPHIC PRECIPITATION, Annu. Rev. Earth Planet. Sci., 33, 645–671,  
<https://doi.org/10.1146/annurev.earth.33.092203.122541>, 2005.

660 Roe, G. H.: What do glaciers tell us about climate variability and climate change?, Journal of Glaciology, 57, 567–578,  
<https://doi.org/10.3189/002214311796905640>, 2011.



- Roe, G. H. and O'Neal, M. A.: The response of glaciers to intrinsic climate variability: observations and models of late-Holocene variations in the Pacific Northwest, *Journal of Glaciology*, 55, 839–854, 665 <https://doi.org/10.3189/002214309790152438>, 2009.
- Rupper, S. and Roe, G.: Glacier Changes and Regional Climate: A Mass and Energy Balance Approach, *Journal of Climate*, 21, 5384–5401, <https://doi.org/10.1175/2008JCLI2219.1>, 2008.
- 670 Rutledge, S. A. and Ciesielski, P.: Quality--Control of Upper-Air Soundings for OLYMPEX, [https://ghrc.nsstc.nasa.gov/pub/fieldCampaigns/gpmValidation/olympex/upa\\_soundings/doc/OLYMPEX\\_sonde\\_qc.pdf](https://ghrc.nsstc.nasa.gov/pub/fieldCampaigns/gpmValidation/olympex/upa_soundings/doc/OLYMPEX_sonde_qc.pdf), 2016.
- Serreze, M. C., Clark, M. P., Armstrong, R. L., McGinnis, D. A., and Pulwarty, R. S.: Characteristics of the western United 675 States snowpack from snowpack telemetry (SNOTEL) data, *Water Resources Research*, 35, 2145–2160, <https://doi.org/10.1029/1999WR900090>, 1999.
- Skamarock, William C., Joseph B. Klemp, Jimy Dudhia, David O. Gill, Dale M. Barker, Wei Wang, and Jordan G. Powers. "A description of the Advanced Research WRF version 3. NCAR Technical note-475+ STR.", 2008.
- 680 Staley, A.E.: Glacial Geomorphology and chronology of the Quinault Valley, Washington and Broader evidence of marine isotope stages 4 and 2 glaciation across the northwestern United States, M.S. Thesis, Idaho State University, Pocatello, ID, USA., 100pp., <https://isu.app.box.com/v/Staley-2015>, 2015.
- 685 Tabor, R. W. and Cady, W. M.: The Structure of the Olympic Mountains, Washington: Analysis of a Subduction Zone, U.S. Government Printing Office, 52 pp., 1978.
- Thackray, G. D.: Extensive Early and Middle Wisconsin Glaciation on the Western Olympic Peninsula, Washington, and the Variability of Pacific Moisture Delivery to the Northwestern United States, *Quaternary Research*, 55, 257–270, 690 <https://doi.org/10.1006/qres.2001.2220>, 2001.
- Tropical/Northern Hemisphere Pattern (TNH): [https://climexp.knmi.nl/data/icpc\\_tnh.dat](https://climexp.knmi.nl/data/icpc_tnh.dat), last access: 20 December 2022
- US Geological Survey, Water Resources Data, Elwha River: 695 [https://waterdata.usgs.gov/wa/nwis/monthly/?referred\\_module=sw&site\\_no=12045500&por\\_12045500\\_148527=1](https://waterdata.usgs.gov/wa/nwis/monthly/?referred_module=sw&site_no=12045500&por_12045500_148527=1)



[179104,00060,148527,1897-10,2021-01&format=rdb&date\\_format=YYYY-MM-DD&rdb\\_compression=value&submitted\\_form=parameter\\_selection\\_list](https://waterdata.usgs.gov/nwis/monthly/?referred_module=sw&site_no=12039500&por_12039500_148486=1179001,00060,148486,1911-10,2020-09&format=rdb&date_format=YYYY-MM-DD&rdb_compression=value&submitted_form=parameter_selection_list), last access: 20 December 2022

US Geological Survey, Water Resources Data, Quinault River:  
700 [https://waterdata.usgs.gov/nwis/monthly/?referred\\_module=sw&site\\_no=12039500&por\\_12039500\\_148486=1179001,00060,148486,1911-10,2020-09&format=rdb&date\\_format=YYYY-MM-DD&rdb\\_compression=value&submitted\\_form=parameter\\_selection\\_list](https://waterdata.usgs.gov/nwis/monthly/?referred_module=sw&site_no=12039500&por_12039500_148486=1179001,00060,148486,1911-10,2020-09&format=rdb&date_format=YYYY-MM-DD&rdb_compression=value&submitted_form=parameter_selection_list), last access: 20 December 2022

Wagon, P., Sicart, J.-E., Berthier, E., and Chazarin, J.-P.: Wintertime high-altitude surface energy balance of a Bolivian  
705 glacier, Illimani, 6340 m above sea level, *Journal of Geophysical Research: Atmospheres*, 108,  
<https://doi.org/10.1029/2002JD002088>, 2003.

Willett, S. D.: Orogeny and orography: The effects of erosion on the structure of mountain belts, *Journal of Geophysical  
710 Research: Solid Earth*, 104, 28957–28981, <https://doi.org/10.1029/1999JB900248>, 1999.

Zagrodnik, J. P., McMurdie, L. A., Houze, R. A., and Tanelli, S.: Vertical Structure and Microphysical Characteristics of  
Frontal Systems Passing over a Three-Dimensional Coastal Mountain Range, *Journal of the Atmospheric Sciences*, 76, 1521–  
1546, <https://doi.org/10.1175/JAS-D-18-0279.1>, 2019.
